# Supplementary material for: Concurrent Infection with SARS-CoV-2 and Pneumocystis jirovecii in Immunocompromised and Immunocompetent Individuals
Source: MDPI journal article supplement (doi:10.3390/jof8060585), 2022-05-30
Supplement: s1 [file s1]

# *Concurrent Infection with SARS-CoV-2 and Pneumocystis Jirovecii in immunocompromised and immunocompetent individuals*

Francesca Gioia, Hanan Albasata and [Seyed M Hosseini-Moghaddam](#)

[Data S1](#)

[Search strategies:](#)

## **1. Ovid MEDLINE(R) ALL**

(((((("COVID-19"[Mesh]) OR ("SARS-CoV-2"[Mesh])) OR ("Coronavirus"[Mesh])) OR ("covid-19")) OR (corona\*)) OR ("sars-cov-2")) AND (((("Pneumocystis carinii"[Mesh]) OR ("Pneumonia, Pneumocystis"[Mesh])) OR (Pneumocystis)))

## **2. Embase**

('coronavirus disease 2019'/de OR 'severe acute respiratory syndrome coronavirus 2'/de OR 'coronavirus infection'/de OR 'covid 19':ab,ti OR 'corona\*':ab, ti OR 'sars-cov-2':ab,ti) AND ('pneumocystosis'/exp OR pneumocystosis:ab,ti) AND [embase]/lim
